# Supplementary material for: Combination Venetoclax and Selinexor Effective in Relapsed Refractory Multiple Myeloma with Translocation t(11;14)
Source: bioRxiv or medRxiv preprint supplement (doi:10.1101/2022.08.01.22278282), 2022-08-04
Supplement: Supplementary file [file media-1.pdf]

# **Combination Venetoclax and Selinexor Effective in Relapsed Refractory Multiple Myeloma with Translocation t(11;14)**

## **Supplementary Appendix**

### **Table of Contents:**

**Supplementary Figure and Text (page 2-3)**

**Supplementary Table (page 4)**

Nina Nguyen, MD<sup>1#</sup>, Sana Chaudhry, BSc<sup>1#</sup>, Tulasigeri M. Totiger, PhD<sup>1#</sup>, Robert Diaz, MS<sup>1</sup>, Evan Roberts, BSc<sup>1</sup>, Skye Montoya, BSc<sup>1</sup>, Gabriel Pardo BSc<sup>1</sup>, Alejandro Pardo BSc<sup>1</sup>, Jumana Afaghani, BSc<sup>1</sup>, Maurizio Affer, MSc<sup>1</sup>, Jacob Jahn, BSc<sup>1</sup>, Terrence Bradley, MD<sup>3</sup>, Francesco Maura, MD<sup>2</sup>, Dickran Kazandjian, MD<sup>2</sup>, Daniel Bilbao, PhD<sup>1</sup>, Jennifer Chapman, MD<sup>4</sup>, Ola Landgren, MD, PhD<sup>2</sup>, James Hoffman, MD<sup>2\*</sup>, and Justin Taylor, MD<sup>3\*</sup>

# Supplementary Figure 1

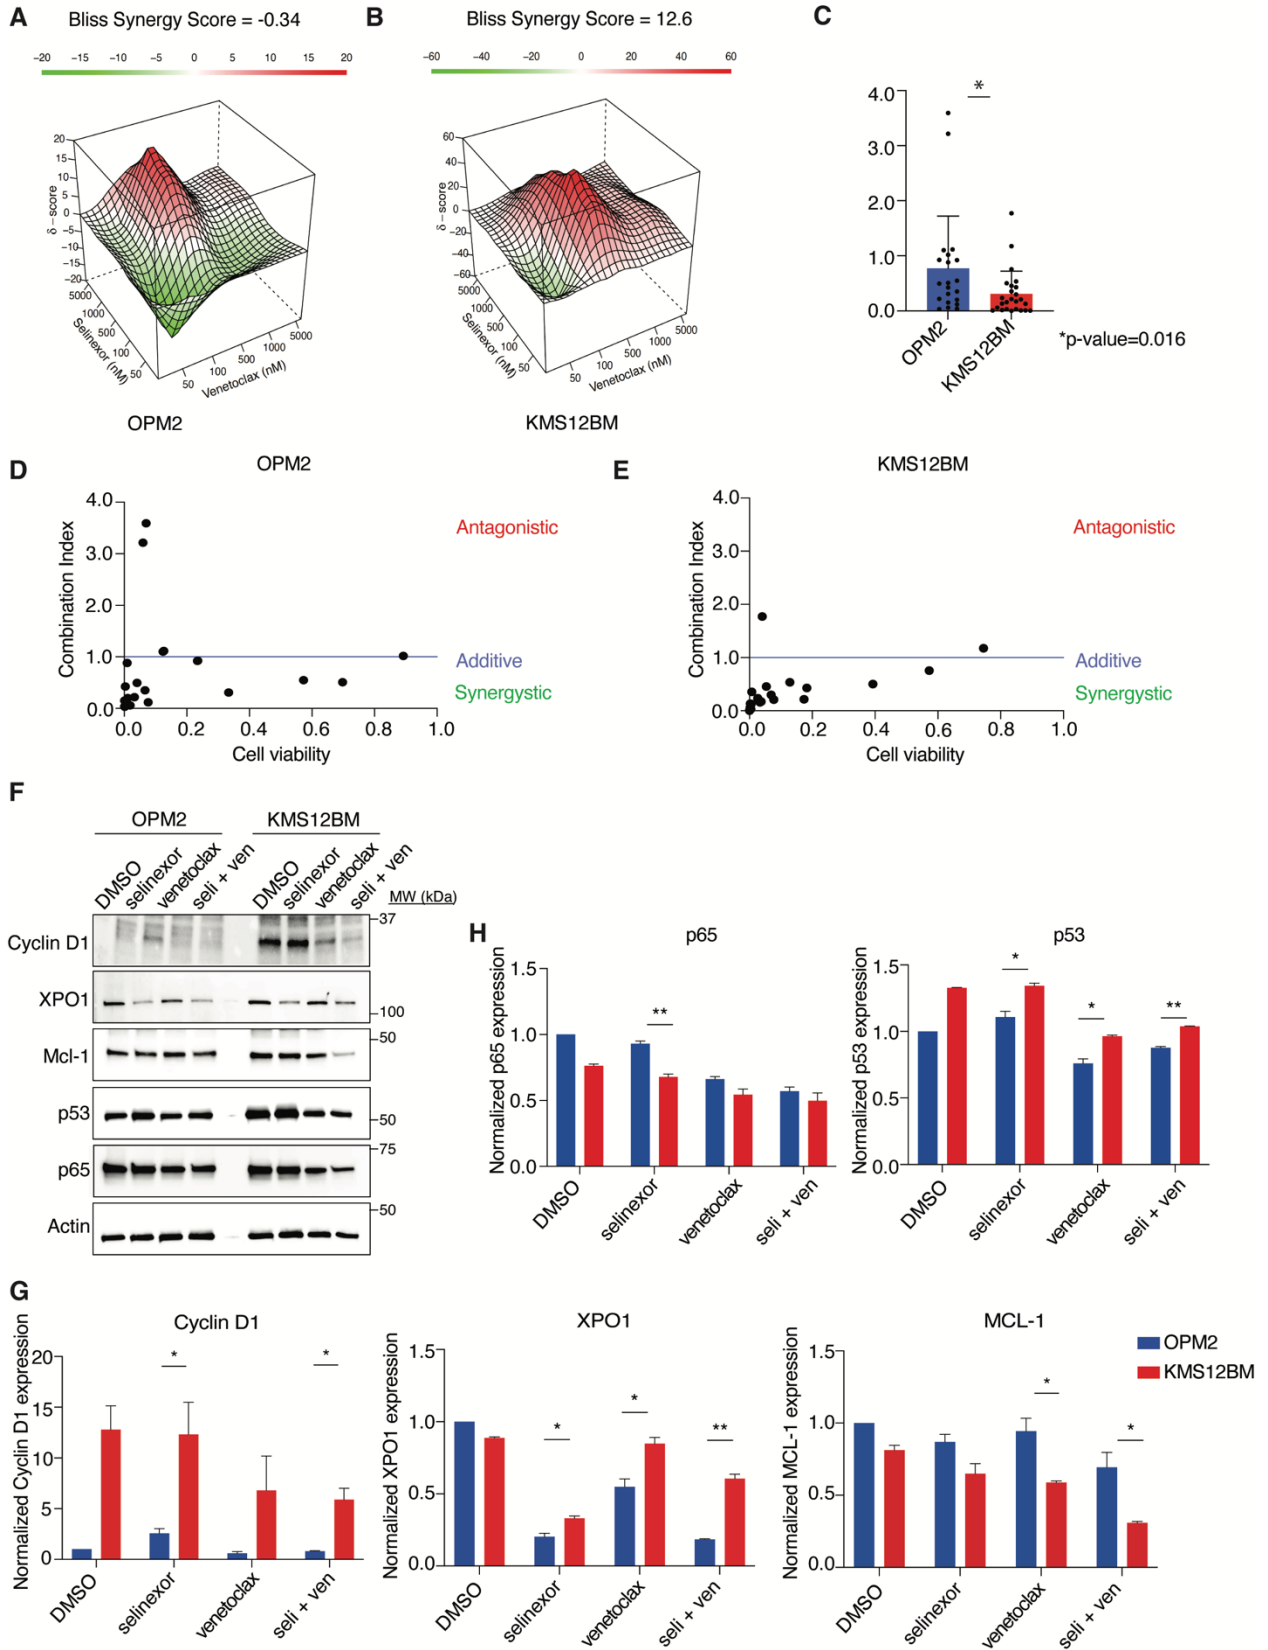

**Supplementary Figure 1. The combination of selinexor and venetoclax show higher levels of synergy and decreased levels of Cyclin D1, XPO1, and MCL-1 protein levels in KMS12BM.**

OPM2 and KMS12BM were treated with increasing doses of selinexor and venetoclax for 72 hours and cell viability was measured using CellTiter-Glo. Contour plots were calculated using the Bliss Independence model and were generated using the SynergyFinder web application. Red indicates synergism and green indicates antagonism (**Panel A and B**). The synergy of OPM2 and KMS12BM was compared using Combination Index (CI) values. The difference was measured using Student's t-test (**Panel C**). The synergy was also calculated using the CompuSyn software.

Combination Index values  $>1$  indicates antagonism,  $=1$  indicates additivity,  $<1$  indicates synergy (**Panel D and E**). OPM2 and KMS12BM were treated with selinexor (200nM) and venetoclax(1 $\mu$ M) for 16 hours and subjected to a Western blot using various antibodies as indicated (**Panel F**). The normalized protein levels of p65, p53, Cyclin D1, XPO1, and MCL-1 was calculated by the intensity of the Western blot bands using Image J software (**Panel G and H**).

| <b>Cell Lines</b> | <b>MM IgH translocation</b>             |
|-------------------|-----------------------------------------|
| U266-B1           | t(11;14)(CCND1/IGH)                     |
| KMS-12-BM         | t(11;14)(CCND1/IGH)                     |
| MOLP-8            | t(11;14)(CCND1/IGH)                     |
| SK-MM-2           | t(11;14)(CCND1/IGH)                     |
| NCI-H929          | t(4;14)(MMSET/IGH)                      |
| LP-1              | t(4;14)(MMSET/IGH)                      |
| OPM-2             | t(4;14)(MMSET/IGH)<br>t(?;20)(?;MAFB)   |
| EJM               | t(14;20)(IGH/MAF)                       |
| L-363             | t(6;20)(?;MAFB)                         |
| KARPAS-620        | t(8;11)(CCND1)                          |
| JJN-3             | t(14;16)(IGH/MAF)                       |
| MM1S              | t(14;16)(IGH/MAF)                       |
| KMS-11            | t(4;14)(MMSET/IGH)<br>t(14;16)(IGH/MAF) |
| RPMI-8226         | t(16;22)(MAF;IGL)                       |
| AMO-1             | -                                       |
| MC-CAR            | -                                       |
| IM-9              | -                                       |
| ARH-77            | -                                       |

**Supplemental Table 1. List of multiple myeloma (MM) cell lines according to their immunoglobulin heavy chain (IgH) translocation.**

Abbreviations: CCND1, Cyclin D1; IGH, immunoglobulin heavy chain; MMSET, multiple myeloma SET domain; IGL, immunoglobulin light chain
